# Supplementary material
Source: HighWire-hosted journal article supplement (https://bmjopen.bmj.com/content/9/2/e024561)
Supplement: inline-supplementary-material-2 [file inline-supplementary-material-2.pdf]

**Supplementary Table 1:** Items from the World Health Organization Trial Registration Data Set

| Data category                                 | Information                                                                                                                                                                                                                                                                                                                                                                                                                                                        |
|-----------------------------------------------|--------------------------------------------------------------------------------------------------------------------------------------------------------------------------------------------------------------------------------------------------------------------------------------------------------------------------------------------------------------------------------------------------------------------------------------------------------------------|
| Primary registry and trial identifying number | ClinicalTrials.gov<br>NCT03147807                                                                                                                                                                                                                                                                                                                                                                                                                                  |
| Date of registration in primary registry      | 10 May, 2017                                                                                                                                                                                                                                                                                                                                                                                                                                                       |
| Secondary identifying numbers                 | EudraCT 2016-A00941-50, IDRCB 2016-A00941-50                                                                                                                                                                                                                                                                                                                                                                                                                       |
| Source(s) of monetary or material support     | French Health Ministry Program « Programme Hospitalier de Recherche Clinique 2015 »<br>Biorad® Laboratories                                                                                                                                                                                                                                                                                                                                                        |
| Primary sponsor                               | Assistance Publique-Hôpitaux de Paris                                                                                                                                                                                                                                                                                                                                                                                                                              |
| Secondary sponsor(s)                          | -                                                                                                                                                                                                                                                                                                                                                                                                                                                                  |
| Contact for public queries                    | <i>Marc Garnier</i> , MD, PhD<br>APHP, Tenon University Hospital, Anaesthesiology and Critical Care Medicine Department<br>+33(0)156016384, marcgarnier@gmail.com                                                                                                                                                                                                                                                                                                  |
| Contact for scientific queries                | <i>Marc Garnier</i> , MD, PhD<br>APHP, Tenon University Hospital, Anaesthesiology and Critical Care Medicine Department<br>+33(0)156016384, marcgarnier@gmail.com                                                                                                                                                                                                                                                                                                  |
| Public title                                  | $\beta$ LACTA™ test for Early De-escalation of Empirical Carbapenems in Pulmonary, Urinary and Bloodstream Infections in Intensive Care Unit (BLUE CARbA)                                                                                                                                                                                                                                                                                                          |
| Scientific title                              | Multicentre randomised controlled trial to investigate the usefulness of the rapid diagnostic $\beta$ LACTA™ test performed directly on bacterial cell pellets from respiratory, urinary or blood samples for the early de-escalation of carbapenems in septic intensive care unit patients: the BLUE-CarbA protocol                                                                                                                                               |
| Countries of recruitment                      | France                                                                                                                                                                                                                                                                                                                                                                                                                                                             |
| Health condition(s) or problem(s) studied     | ICU pulmonary, urinary and bloodstream infections empirically treated with carbapenems                                                                                                                                                                                                                                                                                                                                                                             |
| Intervention(s)                               | <i>Interventional group:</i> Early carbapenem adaptation before the second dose delivery based on the result of the betaLACTA® test directly performed on a bronchial aspirate sample and/or a urinary sample and/or a blood culture positive for Gram Negative Bacilli on direct examination.<br><i>Conventional group:</i> Carbapenem adaptation based on the results of the antibiotic susceptibility tests obtained after 48-72h of microbiological culturing. |
| Key inclusion and exclusion criteria          | Ages eligible for study: $\geq 18$ years<br>Sexes eligible for study: both<br><br><i>Inclusion criteria:</i> ICU adult patient ( $\geq 18$ years); suffering from a suspected pneumonia,                                                                                                                                                                                                                                                                           |

|                         |                                                                                                                                                                                                                                                                                                                                                                                                                                                                                                                                                                                                                                                                                                                                                                                                                                                                                                                                                                                                                                                                                                                                                                                                                                                                                       |
|-------------------------|---------------------------------------------------------------------------------------------------------------------------------------------------------------------------------------------------------------------------------------------------------------------------------------------------------------------------------------------------------------------------------------------------------------------------------------------------------------------------------------------------------------------------------------------------------------------------------------------------------------------------------------------------------------------------------------------------------------------------------------------------------------------------------------------------------------------------------------------------------------------------------------------------------------------------------------------------------------------------------------------------------------------------------------------------------------------------------------------------------------------------------------------------------------------------------------------------------------------------------------------------------------------------------------|
|                         | <p>and/or urinary tract infection, and/or primary blood-stream infection; leading to an empirical carbapenem prescription for &lt;6 hours; with the presence of <math>\geq 2</math>GNB/field on direct examination of a tracheo-bronchial aspirate sample, urinary sample or blood culture; written informed consent signed by the patient, the trustworthy person, the next-of-kin or close relative; or inclusion in case of emergency (followed by written informed consent signature by the patient as soon as possible); participating in a social security scheme or benefiting from such a scheme by means of a third party.</p> <p><i>Exclusion criteria:</i> Pregnancy; allergy to beta-lactam antibiotics; ongoing treatment with carbapenems for another infection; aplasia; participation to another interventional study pertaining to an anti-infective treatment, whose primary aim is mortality and/or recurrence of the infection; patients in whom a procedure of withdrawing life-sustaining treatment was decided before inclusion; patient likely to die in the 48 hours following inclusion; patients benefiting from reinforced protection or persons deprived of freedom subsequent to a legal or administrative decision, majors under legal protection.</p> |
| Study type              | <p>Interventional</p> <p>Allocation: randomized</p> <p>Intervention model: parallel assignment</p> <p>Masking: open-label study (no blindness for subject and investigators), with masking to the group assignment for the experts of the endpoint adjudication committee and the statisticians</p> <p>Primary purpose: curative anti-infectious treatment</p> <p>Phase III</p>                                                                                                                                                                                                                                                                                                                                                                                                                                                                                                                                                                                                                                                                                                                                                                                                                                                                                                       |
| Date of first enrolment | November 2017                                                                                                                                                                                                                                                                                                                                                                                                                                                                                                                                                                                                                                                                                                                                                                                                                                                                                                                                                                                                                                                                                                                                                                                                                                                                         |
| Target sample size      | 646                                                                                                                                                                                                                                                                                                                                                                                                                                                                                                                                                                                                                                                                                                                                                                                                                                                                                                                                                                                                                                                                                                                                                                                                                                                                                   |
| Recruitment status      | Recruiting                                                                                                                                                                                                                                                                                                                                                                                                                                                                                                                                                                                                                                                                                                                                                                                                                                                                                                                                                                                                                                                                                                                                                                                                                                                                            |
| Primary outcome(s)      | Composite endpoint combining 90-day mortality and proportion of infection recurrence (same GNB on the same site of infection) during the ICU stay (within the limit of 90 days).                                                                                                                                                                                                                                                                                                                                                                                                                                                                                                                                                                                                                                                                                                                                                                                                                                                                                                                                                                                                                                                                                                      |
| Key secondary outcomes  | <ol style="list-style-type: none"> <li>1. Number of days with carbapenem treatment after inclusion during ICU stay (within the limit of 28 days); number of carbapenems Defined Daily Doses after inclusion during ICU stay (within the limit of 28 days); number of carbapenem-free and antibiotic-free days at day 28 after inclusion.</li> <li>2. Proportion of new infections (same site of infection with another bacteria or other site of infection) during ICU stay (within the limit of 90 days).</li> <li>3. New colonization of patients' digestive tractus with ESBL-producing and carbapenemase-producing Gram Negative Bacilli at day 3 and at the end of the antibiotic treatment of the current infection.</li> <li>4. ICU and hospital lengths of stay following randomization; total cost and incremental cost-effectiveness ratio (cost per additional death/ infection averted).</li> </ol>                                                                                                                                                                                                                                                                                                                                                                       |
